# Supplementary material for: Are the current gRNA ranking prediction algorithms useful for genome editing in plants?
Source: PLoS One. 2020 Jan 24;15(1):e0227994. doi: 10.1371/journal.pone.0227994 (PMC6980586; doi:10.1371/journal.pone.0227994)
Supplement: S1 Data — (DOCX) [file pone.0227994.s001.docx]

Supplementary Material

**­Are the current gRNA ranking prediction algorithms useful for genome editing in plants?**

Fatima Naimab*, Kylie Shanda, Satomi Hayashia, Martin O’Brienc, James McGreed, Alexander A. T. Johnsonc, Benjamin Dugdalea and Peter M. Waterhousea*

aCentre for Tropical Crops and Biocommodities, Science and Engineering Faculty, Queensland University of Technology, Brisbane, Queensland 4000, Australia

bCentre for Crop and Disease Management, School of Molecular and Life Sciences, Curtin University, Bentley, Western Australia 6102, Australia

cSchool of BioSciences, The University of Melbourne, Victoria 3010, Australia

dSchool of Mathematical Sciences, Science and Engineering Faculty, Queensland University of Technology, Brisbane, Queensland 4000, Australia

* Correspondence

Dr Fatima Naim

[fatima.naim@curtin.edu.au](mailto:fatima.naim@curtin.edu.au)

Professor Peter Waterhouse

[peter.waterhouse@qut.edu.au](mailto:peter.waterhouse@qut.edu.au)

**Supplementary Fig 1.** NanoLuc luminescence measured in leaf tissue infiltrated with p2X35S-NanoLuc-NOSt (p35S-NLUC), p19 and with or without an editing construct targeting NanoLuc. Control infiltration contained p2X35S-NanoLuc-NOSt (p35S-NLUC), p19 and an editing construct targeting an endogenous *N.benthamiana* gene.

NanoLuc Luminescence

Infiltration treatments


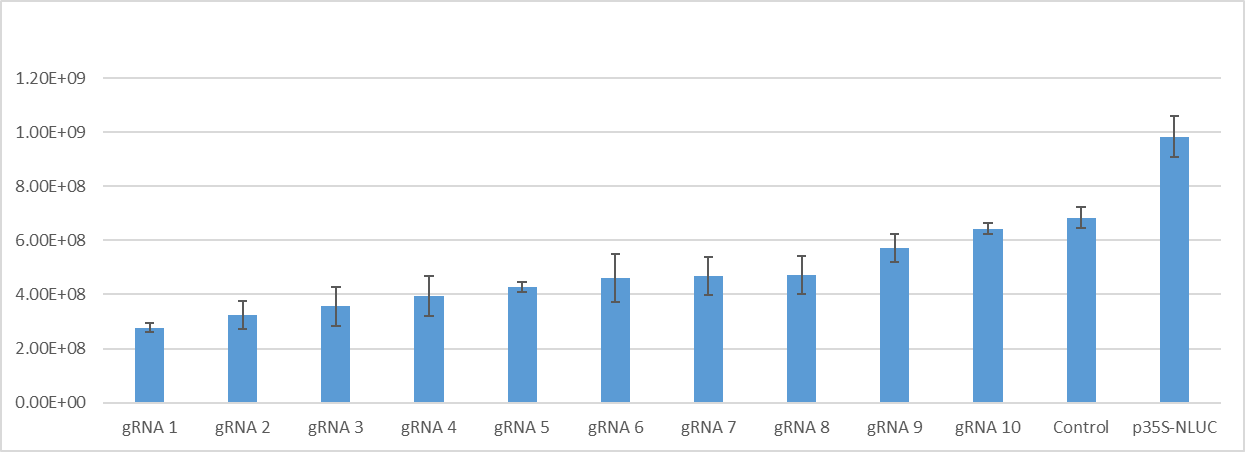


**Supplementary Figure 2.** Statistical analysis of observed Vs predicted rankings for 22 gRNAs targeting genes in various plant species.

- An observed variable (real data, denote as ‘y’);
- 9 predictor variables (from algorithms, denote as x1, x2, ..., x9) (CRISPRko, WU-CRISPR, CRISPOR-D, CRISPOR-M, Benchling, CCTop, sgRNA scorer 2.0, CRISPR-P, Cas-Designer)

1. **Assume linear model appropriate (normally distributed errors)**


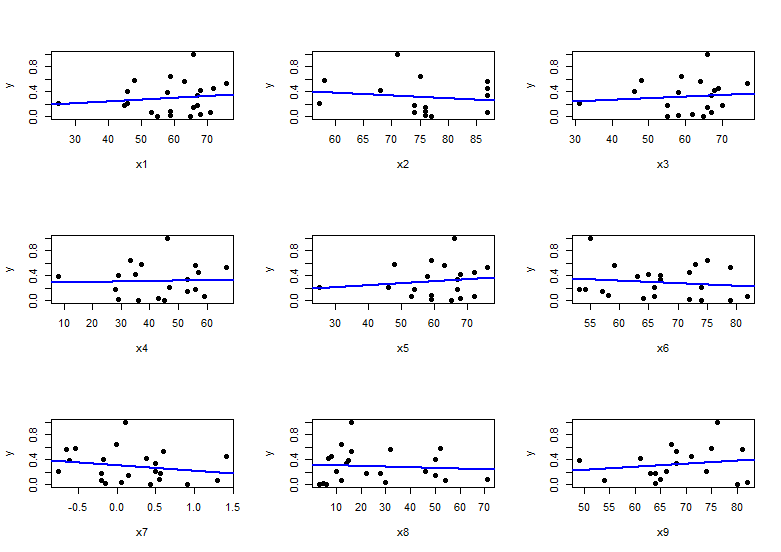


Summary of results for each regression model

|  | Estimate | Std. Error | t-value | Pr(>|t|) |
| --- | --- | --- | --- | --- |
| (Intercept) | 0.139079 | 0.294245 | 0.472663 | 0.641571 |
| X1 | 0.002712 | 0.004881 | 0.555693 | 0.584584 |
|  |  |  |  |  |
| (Intercept) | 0.62828 | 0.628726 | 0.99929 | 0.335892 |
| X2 | -0.00408 | 0.008285 | -0.49213 | 0.630835 |
|  |  |  |  |  |
| (Intercept) | 0.167104 | 0.377076 | 0.443157 | 0.66324 |
| X3 | 0.002651 | 0.006138 | 0.431868 | 0.671265 |
|  |  |  |  |  |
| (Intercept) | 0.293294 | 0.204393 | 1.434946 | 0.169445 |
| X4 | 0.0008 | 0.004522 | 0.176864 | 0.861705 |
|  |  |  |  |  |
| (Intercept) | 0.136155 | 0.333126 | 0.40872 | 0.687848 |
| X5 | 0.003006 | 0.005431 | 0.553568 | 0.587082 |
|  |  |  |  |  |
| (Intercept) | 0.579249 | 0.450865 | 1.28475 | 0.213561 |
| X6 | -0.00417 | 0.006677 | -0.62511 | 0.538969 |
|  |  |  |  |  |
| (Intercept) | 0.316986 | 0.057955 | 5.469549 | 2.36E-05 |
| X7 | -0.09357 | 0.095022 | -0.9847 | 0.336536 |
|  |  |  |  |  |
| (Intercept) | 0.324054 | 0.092918 | 3.487506 | 0.002321 |
| X8 | -0.00096 | 0.002907 | -0.33116 | 0.743971 |
|  |  |  |  |  |
| (Intercept) | -0.01572 | 0.508833 | -0.03089 | 0.975739 |
| X9 | 0.00508 | 0.007399 | 0.686509 | 0.502221 |

There is no evidence against there being no linear relationship between these variables. That is, there was no evidence against beta1 (slope) equaling 0.

**Supplementary Table 1.** List of DNA oligos used for assembly of gRNAs corresponding to various targeted genes in this study.

| **Stable** | **gRNA sequence** | **Oligo Sense** | **Oligo Antisense** |
| --- | --- | --- | --- |
| Generic AtU3-BsaI primer | n/a | ATGTACTCGATCAGGTCTCAGGTCAACAAAGC | n/a |
| Generic OsU3-BsaI primer | n/a | ATGTACTCGATCAGGTCTCATGGCAACAAAGC | n/a |
| Generic gRNA-BsaI primer | n/a | n/a | TAGGCATGACTATGGTCTCTGTAGTAAAAAAAAAAGCAC |
| NanoLuc gRNA 1 | TGGCACACTGGTAATCGACG | TAGGTCTCCTGGTAATCGACGGTTTTAGAGCTAGAAATAG | TAGGTCTCAACCAGTGTGCCATGCACCAGCCGGGAATC |
| NanoLuc gRNA 2 | CACCGCTCAGGACAATCCTT | TAGGTCTCCAGGACAATCCTTGTTTTAGAGCTAGAAATAG | TAGGTCTCATCCTGAGCGGTGTGCACCAGCCGGGAATC |
| NanoLuc gRNA 3 | TAAAGTGATGATCATCCACA | TAGGTCTCCTGATCATCCACAGTTTTAGAGCTAGAAATAG | TAGGTCTCAATCATCACTTTATGCACCAGCCGGGAATC |
| NanoLuc gRNA 4 | ATTGTCCTGAGCGGTGAAAA | TAGGTCTCCGAGCGGTGAAAAGTTTTAGAGCTAGAAATAG | TAGGTCTCAGCTCAGGACAATTGCACCAGCCGGGAATC |
| NanoLuc gRNA 5 | GACCAAGTCCTTGAACAGGG | TAGGTCTCCCCTTGAACAGGGGTTTTAGAGCTAGAAATAG | TAGGTCTCAAAGGACTTGGTCTGCACCAGCCGGGAATC |
| NanoLuc gRNA 6 | GATGGTTACTCGGAACAGCA | TAGGTCTCCCTCGGAACAGCAGTTTTAGAGCTAGAAATAG | TAGGTCTCACGAGTAACCATCTGCACCAGCCGGGAATC |
| NanoLuc gRNA 7 | CAGTTTGTTTCAGAATCTCG | TAGGTCTCCTTCAGAATCTCGGTTTTAGAGCTAGAAATAG | TAGGTCTCATGAAACAAACTGTGCACCAGCCGGGAATC |
| NanoLuc gRNA 8 | AACACGGCGATGCCTTCATA | TAGGTCTCCGATGCCTTCATAGTTTTAGAGCTAGAAATAG | TAGGTCTCACATCGCCGTGTTTGCACCAGCCGGGAATC |
| NanoLuc gRNA 9 | TGTCCGTAACTCCGATCCAA | TAGGTCTCCACTCCGATCCAAGTTTTAGAGCTAGAAATAG | TAGGTCTCAGAGTTACGGACATGCACCAGCCGGGAATC |
| NanoLuc gRNA 10 | ATGGCACACTGGTAATCGAC | TAGGTCTCCCTGGTAATCGACGTTTTAGAGCTAGAAATAG | TAGGTCTCACCAGTGTGCCATTGCACCAGCCGGGAATC |
| AtMir166a target 1 | CAATTGGGGGGAATGAAGCC | TAGGTCTCCGGGAATGAAGCCGTTTTAGAGCTAGAAATAG | TAGGTCTCATCCCCCCAATTGTGCACCAGCCGGGAATC |
| AtMir166a target 3 | GATCTCGCAGTAAAAACATT | TAGGTCTCCAGTAAAAACATTGTTTTAGAGCTAGAAATAG | ATGGTCTCATACTGCGAGATCTGCACCAGCCGGGAATC |
| MaPDS target 1 | GTCTCTCCCATGAAGTTAAG | TAGGTCTCCCATGAAGTTAAGGTTTTAGAGCTAGAAATAG | TAGGTCTCACATGGGAGAGACTGCACCAGCCGGGAATC |
| MaPDS target 2 | AAGGACAAGAAGCCAAGACA | TAGGTCTCCGAAGCCAAGACAGTTTTAGAGCTAGAAATAG | ATGGTCTCACTTCTTGTCCTTTGCACCAGCCGGGAATC |
| MaRDR1 target 1 | TTTGGAAGACTACATTCGAA | TAGGTCTCCACTACATTCGAAGTTTTAGAGCTAGAAATAG | TAGGTCTCATAGTCTTCCAAATGCACCAGCCGGGAATC |
| MaRDR1 target 2 | CCTGTTTCGCTCCTGCTGAA | TAGGTCTCCGCTCCTGCTGAAGTTTTAGAGCTAGAAATAG | ATGGTCTCAGAGCGAAACAGGTGCACCAGCCGGGAATC |
| mGFP5-ER target 1 | CTTGTCACTACTTTCTCTTA | TAGGTCTCCTACTTTCTCTTAGTTTTAGAGCTAGAAATAG | TAGGTCTCAAGTAGTGACAAGTGCACCAGCCGGGAATC |
| mGFP5-ER target 2 | CGCCACAACATCGAAGACGG | TAGGTCTCCCATCGAAGACGGGTTTTAGAGCTAGAAATAG | ATGGTCTCAGATGTTGTGGCGTGCACCAGCCGGGAATC |
| NbFAD2 target 1 | ATATCACCAACTGTGAAAGG | TAGGTCTCCAACTGTGAAAGGGTTTTAGAGCTAGAAATAG | TAGGTCTCAAGTTGGTGATATTGCACCAGCCGGGAATC |
| NbFAD2 target 2 | AGGGCACCATCAGAGCAGAG | TAGGTCTCCATCAGAGCAGAGGTTTTAGAGCTAGAAATAG | ATGGTCTCATGATGGTGCCCTTGCACCAGCCGGGAATC |
| NbFAD2 target A | GAGGTTGGTACCTTTTCAAG | TAGGTCTCCTACCTTTTCAAGGTTTTAGAGCTAGAAATAG | TAGGTCTCAGGTACCAACCTCTGCACCAGCCGGGAATC |
| NbFAD2 target B | GGTAGCAATATGGGGACGGG | TAGGTCTCCTATGGGGACGGGGTTTTAGAGCTAGAAATAG | ATGGTCTCACATATTGCTACCTGCACCAGCCGGGAATC |
| NbFAD2 target C | GTGAGCCAGTGTTGGAGTGG | TAGGTCTCCGTGTTGGAGTGGGTTTTAGAGCTAGAAATAG | TAGGTCTCAACACTGGCTCACTGCACCAGCCGGGAATC |
| NbFAD2 target D | GCATGTCACTATGACCCTTA | TAGGTCTCCCTATGACCCTTAGTTTTAGAGCTAGAAATAG | TAGGTCTCAATAGTGACATGCTGCACCAGCCGGGAATC |
| NbFAD2 target E | GGATTGGCTAAGGGGAGCTT | TAGGTCTCCTAAGGGGAGCTTGTTTTAGAGCTAGAAATAG | ATGGTCTCACTTAGCCAATCCTGCACCAGCCGGGAATC |
| NbRDR1 target 1 | ATCTCATCATCGTTCGAACG | TAGGTCTCCATCGTTCGAACGGTTTTAGAGCTAGAAATAG | TAGGTCTCACGATGATGAGATTGCACCAGCCGGGAATC |
| NbRDR1 target 2 | CATCCATGTTCTTATCCACA | TAGGTCTCCTTCTTATCCACAGTTTTAGAGCTAGAAATAG | ATGGTCTCAAGAACATGGATGTGCACCAGCCGGGAATC |
| NbRDR1 target 3 | TCATCATTTGCAGTAAGGCC | TAGGTCTCCTGCAGTAAGGCCGTTTTAGAGCTAGAAATAG | TAGGTCTCATGCAAATGATGATGCACCAGCCGGGAATC |
| NbRDR1 target 4 | GAACATGGATGGGTGATTTT | TAGGTCTCCATGGGTGATTTTGTTTTAGAGCTAGAAATAG | ATGGTCTCACCATCCATGTTCTGCACCAGCCGGGAATC |
| NbRDR1 target 5 | TAAATAGTACAGTTTCTCCA | TAGGTCTCCAAGTTTCTCTGGGTTTTAGAGCTAGAAATAG | ATGGTCTCAACTTTGAGTGTCTGCACCAGCCGGGAATC |
| NbRDR1 target 6 | GACACTCAAAGTTTCTCTGG | TAGGTCTCCACAGTTTCTCCAGTTTTAGAGCTAGAAATAG | TAGGTCTCACTGTACTATTTATGCACCAGCCGGGAATC |
| NbRDR2 target 1 | GTGTCTCGAAATGTGCTGCA | TAGGTCTCCAAATGTGCTGCAGTTTTAGAGCTAGAAATAG | ATGGTCTCAATTTCGAGACACTGCACCAGCCGGGAATC |
| NbRDR6 target 1 | CTTACTTAGAAGTCATCAGG | TAGGTCTCCGAAGTCATCAGGGTTTTAGAGCTAGAAATAG | TAGGTCTCACTTCTAAGTAAGTGCACCAGCCGGGAATC |
| NtRDR1 target 1 | TCAAGTCTCTTATAGATCCG | TAGGTCTCCCTTATAGATCCGGTTTTAGAGCTAGAAATAG | TAGGTCTCATAAGAGACTTGATGCACCAGCCGGGAATC |
| NtRDR1 target 2 | AGTGTTGTTATGATCCAGTG | TAGGTCTCCTATGATCCAGTGGTTTTAGAGCTAGAAATAG | ATGGTCTCACATAACAACACTTGCACCAGCCGGGAATC |
| OsIRO3 target 1 | GGATAGGCAGAGTAATGGGA | TAGGTCTCCAGAGTAATGGGAGTTTTAGAGCTAGAAATAG | TAGGTCTCACTCTGCCTATCCTGCACCAGCCGGGAATC |
| OsIRO3 target 2 | GCAGCCGAGGTACCCAACAG | TAGGTCTCCGGTACCCAACAGGTTTTAGAGCTAGAAATAG | ATGGTCTCATACCTCGGCTGCTGCACCAGCCGGGAATC |
| OsVIT1 target 1 | GGACAGCGCTGAGGAATGGA | TAGGTCTCCCTGAGGAATGGAGTTTTAGAGCTAGAAATAG | TAGGTCTCATCAGCGCTGTCCTGCACCAGCCGGGAATC |
| OsVIT1 target 2 | TTACCAGCGGGAGATGAAAA | TAGGTCTCCGGGAGATGAAAAGTTTTAGAGCTAGAAATAG | ATGGTCTCATCCCGCTGGTAATGCACCAGCCGGGAATC |

**Supplementary Table 2.** List of DNA oligos used for amplification of genic regions for Sanger sequencing.

| **Gene** | **Gene specific Sense** | **Gene Specific Antisense** |
| --- | --- | --- |
| AtMir166a | CATGGCCATAATTTGTTTGC | CTATCGGTCCCCAAAGACCT |
| MaPDS | TTTAATTATCGATTGTAGATAGACC | GAGGGCTG GCACCATGTCTTGGCT |
| MaRDR1 | CGTAATACTGGTTCCCTATATGAAG | GTCACCTGCACCCTGTGAAC |
| mGFP5-ER | GGGCACAAATTTTCTGTCAGTGG | CGCAAGACCGGCAACAGGATTC |
| NbFAD2 | ATGGGAGCTGGTGGTAATATG | CGGCCTGGTGGATTGTTCAAG |
| NbFAD2 | CTTGAACAATCCACCAGGCCG | GCCTCCATTGCATTGTAGTGTG |
| NbFAD2 | GCCTTTAGTGACTACCAGTGG | CCACTGGTAGTCACTAAAGGC |
| NbRDR1 | AAGGGTCGTAGTGACACCAT | CAACATCATGCCTACCGACACTC |
| NbRDR1 | ACATGGATGCTTTCCTGGGG | ACGGCAACTCTACGAGCAAA |
| NbRDR2 | TCTTTTCCTGGCGTTCTCGG | TCGTGCATAAACCTGGCCAT |
| NbRDR6 | CATTCAACGGGGCATGCAAA | TCCAACTCTCCAGTTCTCTCGA |
| NtRDR1 | AAGCCATTCCGAAGAGTTGA | AGTTATTTGGTGCTCCTCGGATC |
| OsIRO3 | ACTAGCAACTGGATTCATCATTGC | TGTGCTATCATCTATCGTGCTACC |
| OsVIT1 | CACTTACCCGCAATTGCACC | GCCTTGGCCATTCCATATGC |

**Sequences:**

AtU3 promoter

CTTATGGCTCAGCCTGTGATGGATAACTGAATCAAACAAATGGCGTCTGGGTTTAAGAAGATCTGTTTTGGCTATGTTGGACGAAACAAGTGAACTTTTAGGATCAACTTCCGTTTATATACGGAGCTTATATCGAGCAATAAGATAAGTGGGCTTTTTATGTAATTTAATGGGCTATCGTCCATATATTCACTAATACCCATGCCCAGTACCCATGTATGCGTTTCATATAAGCTCCTAATTTCTCCCACATCGCTCAAATCTAAACAAATCTTGTTGTATATATAACACTGAGGGAGCACCATTGGTC

OsU3 promoter

AAGGAATCTTTAAACATACGAACAGATCACTTAAAGTTCTTCTGAAGCAACTTAAAGTTATCAGGCATGCATGGATCTTGGAGGAATCAGATGTGCAGTCAGGGACCATAGCACAAGACAGGCGTCTTCTACTGGTGCTACCAGCAAATGCTGGAAGCCGGGAACACTGGGTACGTTGGAAACCACGTGATGTGAAGAAGTAAGATAAACTGTAGGAGAAAAGCATTTCGTAGTGGGCCATGAAGCCTTTCAGGACATGTATTGCAGTATGGGCCGGCCCATTACGCAATTGGACGACAACAAAGACTAGTATTAGTACCACCTCGGCTATCCACATAGATCAAAGCTGATTTAAAAGAGTTGTGCAGATGATCCGTGGC

NanoLuc ORF

ATGGTCTTCACACTCGAAGATTTCGTTGGGGACTGGCGACAGACAGCCGGCTACAACCTGGACCAAGTCCTTGAACAGGGAGGTGTGTCCAGTTTGTTTCAGAATCTCGGGGTGTCCGTAACTCCGATCCAAAGGATTGTCCTGAGCGGTGAAAATGGGCTGAAGATCGACATCCATGTCATCATCCCGTATGAAGGTCTGAGCGGCGACCAAATGGGCCAGATCGAAAAAATTTTTAAGGTGGTGTACCCTGTGGATGATCATCACTTTAAGGTGATCCTGCACTATGGCACACTGGTAATCGACGGGGTTACGCCGAACATGATCGACTATTTCGGACGGCCGTATGAAGGCATCGCCGTGTTCGACGGCAAAAAGATCACTGTAACAGGGACCCTGTGGAACGGCAACAAAATTATCGACGAGCGCCTGATCAACCCCGACGGCTCCCTGCTGTTCCGAGTAACCATCAACGGAGTGACCGGCTGGCGGCTGTGCGAACGCATTCTGGCGTAA

hSpCas9

ATGGACAAGAAGTACTCCATTGGGCTCGATATCGGCACAAACAGCGTCGGCTGGGCCGTCATTACGGACGAGTACAAGGTGCCGAGCAAAAAATTCAAAGTTCTGGGCAATACCGATCGCCACAGCATAAAGAAGAACCTCATTGGCGCCCTCCTGTTCGACTCCGGGGAGACGGCCGAAGCCACGCGGCTCAAAAGAACAGCACGGCGCAGATATACCCGCAGAAAGAATCGGATCTGCTACCTGCAGGAGATCTTTAGTAATGAGATGGCTAAGGTGGATGACTCTTTCTTCCATAGGCTGGAGGAGTCCTTTTTGGTGGAGGAGGATAAAAAGCACGAGCGCCACCCAATCTTTGGCAATATCGTGGACGAGGTGGCGTACCATGAAAAGTACCCAACCATATATCATCTGAGGAAGAAGCTTGTAGACAGTACTGATAAGGCTGACTTGCGGTTGATCTATCTCGCGCTGGCGCATATGATCAAATTTCGGGGACACTTCCTCATCGAGGGGGACCTGAACCCAGACAACAGCGATGTCGACAAACTCTTTATCCAACTGGTTCAGACTTACAATCAGCTTTTCGAAGAGAACCCGATCAACGCATCCGGAGTTGACGCCAAAGCAATCCTGAGCGCTAGGCTGTCCAAATCCCGGCGGCTCGAAAACCTCATCGCACAGCTCCCTGGGGAGAAGAAGAACGGCCTGTTTGGTAATCTTATCGCCCTGTCACTCGGGCTGACCCCCAACTTTAAATCTAACTTCGACCTGGCCGAAGATGCCAAGCTTCAACTGAGCAAAGACACCTACGATGATGATCTCGACAATCTGCTGGCCCAGATCGGCGACCAGTACGCAGACCTTTTTTTGGCGGCAAAGAACCTGTCAGACGCCATTCTGCTGAGTGATATTCTGCGAGTGAACACGGAGATCACCAAAGCTCCGCTGAGCGCTAGTATGATCAAGCGCTATGATGAGCACCACCAAGACTTGACTTTGCTGAAGGCCCTTGTCAGACAGCAACTGCCTGAGAAGTACAAGGAAATTTTCTTCGATCAGTCTAAAAATGGCTACGCCGGATACATTGACGGCGGAGCAAGCCAGGAGGAATTTTACAAATTTATTAAGCCCATCTTGGAAAAAATGGACGGCACCGAGGAGCTGCTGGTAAAGCTTAACAGAGAAGATCTGTTGCGCAAACAGCGCACTTTCGACAATGGAAGCATCCCCCACCAGATTCACCTGGGCGAACTGCACGCTATCCTCAGGCGGCAAGAGGATTTCTACCCCTTTTTGAAAGATAACAGGGAAAAGATTGAGAAAATCCTCACATTTCGGATACCCTACTATGTAGGCCCCCTCGCCCGGGGAAATTCCAGATTCGCGTGGATGACTCGCAAATCAGAAGAGACTATCACTCCCTGGAACTTCGAGGAAGTCGTGGATAAGGGGGCCTCTGCCCAGTCCTTCATCGAAAGGATGACTAACTTTGATAAAAATCTGCCTAACGAAAAGGTGCTTCCTAAACACTCTCTGCTGTACGAGTACTTCACAGTTTATAACGAGCTCACCAAGGTCAAATACGTCACAGAAGGGATGAGAAAGCCAGCATTCCTGTCTGGAGAGCAGAAGAAAGCTATCGTGGACCTCCTCTTCAAGACGAACCGGAAAGTTACCGTGAAACAGCTCAAAGAAGATTATTTCAAAAAGATTGAATGTTTCGACTCTGTTGAAATCAGCGGAGTGGAGGATCGCTTCAACGCATCCCTGGGAACGTATCACGATCTCCTGAAAATCATTAAAGACAAGGACTTCCTGGACAATGAGGAGAACGAGGACATTCTTGAGGACATTGTCCTCACCCTTACGTTGTTTGAAGATAGGGAGATGATTGAAGAACGCTTGAAAACTTACGCTCATCTCTTCGACGACAAAGTCATGAAACAGCTCAAGAGGCGCCGATATACAGGATGGGGGCGGCTGTCAAGAAAACTGATCAATGGGATCCGAGACAAGCAGAGTGGAAAGACAATCCTGGATTTTCTTAAGTCCGATGGATTTGCCAACCGGAACTTCATGCAGTTGATCCATGATGACTCTCTCACCTTTAAGGAGGACATCCAGAAAGCACAAGTTTCTGGCCAGGGGGACAGTCTCCACGAGCACATCGCTAATCTTGCAGGTAGCCCAGCTATCAAAAAGGGAATACTGCAGACCGTTAAGGTCGTGGATGAACTCGTCAAAGTAATGGGAAGGCATAAGCCCGAGAATATCGTTATCGAGATGGCCCGAGAGAACCAAACTACCCAGAAGGGACAGAAGAACAGTAGGGAAAGGATGAAGAGGATTGAAGAGGGTATAAAAGAACTGGGGTCCCAAATCCTTAAGGAACACCCAGTTGAAAACACCCAGCTTCAGAATGAGAAGCTCTACCTGTACTACCTGCAGAACGGCAGGGACATGTACGTGGATCAGGAACTGGACATCAATCGGCTCTCCGACTACGACGTGGATCATATCGTGCCCCAGTCTTTTCTCAAAGATGATTCTATTGATAATAAAGTGTTGACAAGATCCGATAAAAATAGAGGGAAGAGTGATAACGTCCCCTCAGAAGAAGTTGTCAAGAAAATGAAAAATTATTGGCGGCAGCTGCTGAACGCCAAACTGATCACACAACGGAAGTTCGATAATCTGACTAAGGCTGAACGAGGTGGCCTGTCTGAGTTGGATAAAGCCGGCTTCATCAAAAGGCAGCTTGTTGAGACACGCCAGATCACCAAGCACGTGGCCCAAATTCTCGATTCACGCATGAACACCAAGTACGATGAAAATGACAAACTGATTCGAGAGGTGAAAGTTATTACTCTGAAGTCTAAGCTGGTTTCAGATTTCAGAAAGGACTTTCAGTTTTATAAGGTGAGAGAGATCAACAATTACCACCATGCGCATGATGCCTACCTGAATGCAGTGGTAGGCACTGCACTTATCAAAAAATATCCCAAGCTTGAATCTGAATTTGTTTACGGAGACTATAAAGTGTACGATGTTAGGAAAATGATCGCAAAGTCTGAGCAGGAAATAGGCAAGGCCACCGCTAAGTACTTCTTTTACAGCAATATTATGAATTTTTTCAAGACCGAGATTACACTGGCCAATGGAGAGATTCGGAAGCGACCACTTATCGAAACAAACGGAGAAACAGGAGAAATCGTGTGGGACAAGGGTAGGGATTTCGCGACAGTCCGGAAGGTCCTGTCCATGCCGCAGGTGAACATCGTTAAAAAGACCGAAGTACAGACCGGAGGCTTCTCCAAGGAAAGTATCCTCCCGAAAAGGAACAGCGACAAGCTGATCGCACGCAAAAAAGATTGGGACCCCAAGAAATACGGCGGATTCGATTCTCCTACAGTCGCTTACAGTGTACTGGTTGTGGCCAAAGTGGAGAAAGGGAAGTCTAAAAAACTCAAAAGCGTCAAGGAACTGCTGGGCATCACAATCATGGAGCGATCAAGCTTCGAAAAAAACCCCATCGACTTTCTCGAGGCGAAAGGATATAAAGAGGTCAAAAAAGACCTCATCATTAAGCTTCCCAAGTACTCTCTCTTTGAGCTTGAAAACGGCCGGAAACGAATGCTCGCTAGTGCGGGCGAGCTGCAGAAAGGTAACGAGCTGGCACTGCCCTCTAAATACGTTAATTTCTTGTATCTGGCCAGCCACTATGAAAAGCTCAAAGGATCTCCCGAAGATAATGAGCAGAAGCAGCTGTTCGTGGAACAACACAAACACTACCTTGATGAGATCATCGAGCAAATAAGCGAATTCTCCAAAAGAGTGATCCTCGCCGACGCTAACCTCGATAAGGTGCTTTCTGCTTACAATAAGCACAGGGATAAGCCCATCAGGGAGCAGGCAGAAAACATTATCCACTTGTTTACTCTGACCAACTTGGGCGCGCCTGCAGCCTTCAAGTACTTCGACACCACCATAGACAGAAAGCGGTACACCTCTACAAAGGAGGTCCTGGACGCCACACTGATTCATCAGTCAATTACGGGGCTCTATGAAACAAGAATCGACCTCTCTCAGCTCGGTGGAGACAGCAGGGCTGACCCCAAGAAGAAGAGGAAGGTGTGA

hSpCas9B

ATGGACTATAAGGACCACGACGGAGACTACAAGGATCATGATATTGATTACAAAGACGATGACGATAAGATGGCCCCAAAGAAGAAGCGGAAGGTCGGTATCCACGGAGTCCCAGCAGCCGACAAGAAGTACAGCATCGGCCTGGACATCGGCACCAACTCTGTGGGCTGGGCCGTGATCACCGACGAGTACAAGGTGCCCAGCAAGAAATTCAAGGTGCTGGGCAACACCGACCGGCACAGCATCAAGAAGAACCTGATCGGAGCCCTGCTGTTCGACAGCGGCGAAACAGCCGAGGCCACCCGGCTGAAGAGAACCGCCAGAAGAAGATACACCAGACGGAAGAACCGGATCTGCTATCTGCAAGAGATCTTCAGCAACGAGATGGCCAAGGTGGACGACAGCTTCTTCCACAGACTGGAAGAGTCCTTCCTGGTGGAAGAGGATAAGAAGCACGAGCGGCACCCCATCTTCGGCAACATCGTGGACGAGGTGGCCTACCACGAGAAGTACCCCACCATCTACCACCTGAGAAAGAAACTGGTGGACAGCACCGACAAGGCCGACCTGCGGCTGATCTATCTGGCCCTGGCCCACATGATCAAGTTCCGGGGCCACTTCCTGATCGAGGGCGACCTGAACCCCGACAACAGCGACGTGGACAAGCTGTTCATCCAGCTGGTGCAGACCTACAACCAGCTGTTCGAGGAAAACCCCATCAACGCCAGCGGCGTGGACGCCAAGGCCATCCTGTCTGCCAGACTGAGCAAGAGCAGACGGCTGGAAAATCTGATCGCCCAGCTGCCCGGCGAGAAGAAGAATGGCCTGTTCGGAAACCTGATTGCCCTGAGCCTGGGCCTGACCCCCAACTTCAAGAGCAACTTCGACCTGGCCGAGGATGCCAAACTGCAGCTGAGCAAGGACACCTACGACGACGACCTGGACAACCTGCTGGCCCAGATCGGCGACCAGTACGCCGACCTGTTTCTGGCCGCCAAGAACCTGTCCGACGCCATCCTGCTGAGCGACATCCTGAGAGTGAACACCGAGATCACCAAGGCCCCCCTGAGCGCCTCTATGATCAAGAGATACGACGAGCACCACCAGGACCTGACCCTGCTGAAAGCTCTCGTGCGGCAGCAGCTGCCTGAGAAGTACAAAGAGATTTTCTTCGACCAGAGCAAGAACGGCTACGCCGGCTACATTGACGGCGGAGCCAGCCAGGAAGAGTTCTACAAGTTCATCAAGCCCATCCTGGAAAAGATGGACGGCACCGAGGAACTGCTCGTGAAGCTGAACAGAGAGGACCTGCTGCGGAAGCAGCGGACCTTCGACAACGGCAGCATCCCCCACCAGATCCACCTGGGAGAGCTGCACGCCATTCTGCGGCGGCAGGAAGATTTTTACCCATTCCTGAAGGACAACCGGGAAAAGATCGAGAAGATCCTGACCTTCCGCATCCCCTACTACGTGGGCCCTCTGGCCAGGGGAAACAGCAGATTCGCCTGGATGACCAGAAAGAGCGAGGAAACCATCACCCCCTGGAACTTCGAGGAAGTGGTGGACAAGGGCGCTTCCGCCCAGAGCTTCATCGAGCGGATGACCAACTTCGATAAGAACCTGCCCAACGAGAAGGTGCTGCCCAAGCACAGCCTGCTGTACGAGTACTTCACCGTGTATAACGAGCTGACCAAAGTGAAATACGTGACCGAGGGAATGAGAAAGCCCGCCTTCCTGAGCGGCGAGCAGAAAAAGGCCATCGTGGACCTGCTGTTCAAGACCAACCGGAAAGTGACCGTGAAGCAGCTGAAAGAGGACTACTTCAAGAAAATCGAGTGCTTCGACTCCGTGGAAATCTCCGGCGTGGAAGATCGGTTCAACGCCTCCCTGGGCACATACCACGATCTGCTGAAAATTATCAAGGACAAGGACTTCCTGGACAATGAGGAAAACGAGGACATTCTGGAAGATATCGTGCTGACCCTGACACTGTTTGAGGACAGAGAGATGATCGAGGAACGGCTGAAAACCTATGCCCACCTGTTCGACGACAAAGTGATGAAGCAGCTGAAGCGGCGGAGATACACCGGCTGGGGCAGGCTGAGCCGGAAGCTGATCAACGGCATCCGGGACAAGCAGTCCGGCAAGACAATCCTGGATTTCCTGAAGTCCGACGGCTTCGCCAACAGAAACTTCATGCAGCTGATCCACGACGACAGCCTGACCTTTAAAGAGGACATCCAGAAAGCCCAGGTGTCCGGCCAGGGCGATAGCCTGCACGAGCACATTGCCAATCTGGCCGGCAGCCCCGCCATTAAGAAGGGCATCCTGCAGACAGTGAAGGTGGTGGACGAGCTCGTGAAAGTGATGGGCCGGCACAAGCCCGAGAACATCGTGATCGAAATGGCCAGAGAGAACCAGACCACCCAGAAGGGACAGAAGAACAGCCGCGAGAGAATGAAGCGGATCGAAGAGGGCATCAAAGAGCTGGGCAGCCAGATCCTGAAAGAACACCCCGTGGAAAACACCCAGCTGCAGAACGAGAAGCTGTACCTGTACTACCTGCAGAATGGGCGGGATATGTACGTGGACCAGGAACTGGACATCAACCGGCTGTCCGACTACGATGTGGACCATATCGTGCCTCAGAGCTTTCTGAAGGACGACTCCATCGACAACAAGGTGCTGACCAGAAGCGACAAGAACCGGGGCAAGAGCGACAACGTGCCCTCCGAAGAGGTCGTGAAGAAGATGAAGAACTACTGGCGGCAGCTGCTGAACGCCAAGCTGATTACCCAGAGAAAGTTCGACAATCTGACCAAGGCCGAGAGAGGCGGCCTGAGCGAACTGGATAAGGCCGGCTTCATCAAGAGACAGCTGGTGGAAACCCGGCAGATCACAAAGCACGTGGCACAGATCCTGGACTCCCGGATGAACACTAAGTACGACGAGAATGACAAGCTGATCCGGGAAGTGAAAGTGATCACCCTGAAGTCCAAGCTGGTGTCCGATTTCCGGAAGGATTTCCAGTTTTACAAAGTGCGCGAGATCAACAACTACCACCACGCCCACGACGCCTACCTGAACGCCGTCGTGGGAACCGCCCTGATCAAAAAGTACCCTAAGCTGGAAAGCGAGTTCGTGTACGGCGACTACAAGGTGTACGACGTGCGGAAGATGATCGCCAAGAGCGAGCAGGAAATCGGCAAGGCTACCGCCAAGTACTTCTTCTACAGCAACATCATGAACTTTTTCAAGACCGAGATTACCCTGGCCAACGGCGAGATCCGGAAGCGGCCTCTGATCGAGACAAACGGCGAAACCGGGGAGATCGTGTGGGATAAGGGCCGGGATTTTGCCACCGTGCGGAAAGTGCTGAGCATGCCCCAAGTGAATATCGTGAAAAAGACCGAGGTGCAGACAGGCGGCTTCAGCAAAGAGTCTATCCTGCCCAAGAGGAACAGCGATAAGCTGATCGCCAGAAAGAAGGACTGGGACCCTAAGAAGTACGGCGGCTTCGACAGCCCCACCGTGGCCTATTCTGTGCTGGTGGTGGCCAAAGTGGAAAAGGGCAAGTCCAAGAAACTGAAGAGTGTGAAAGAGCTGCTGGGGATCACCATCATGGAAAGAAGCAGCTTCGAGAAGAATCCCATCGACTTTCTGGAAGCCAAGGGCTACAAAGAAGTGAAAAAGGACCTGATCATCAAGCTGCCTAAGTACTCCCTGTTCGAGCTGGAAAACGGCCGGAAGAGAATGCTGGCCTCTGCCGGCGAACTGCAGAAGGGAAACGAACTGGCCCTGCCCTCCAAATATGTGAACTTCCTGTACCTGGCCAGCCACTATGAGAAGCTGAAGGGCTCCCCCGAGGATAATGAGCAGAAACAGCTGTTTGTGGAACAGCACAAGCACTACCTGGACGAGATCATCGAGCAGATCAGCGAGTTCTCCAAGAGAGTGATCCTGGCCGACGCTAATCTGGACAAAGTGCTGTCCGCCTACAACAAGCACCGGGATAAGCCCATCAGAGAGCAGGCCGAGAATATCATCCACCTGTTTACCCTGACCAATCTGGGAGCCCCTGCCGCCTTCAAGTACTTTGACACCACCATCGACCGGAAGAGGTACACCAGCACCAAAGAGGTGCTGGACGCCACCCTGATCCACCAGAGCATCACCGGCCTGTACGAGACACGGATCGACCTGTCTCAGCTGGGAGGCGACAAAAGGCCGGCGGCCACGAAAAAGGCCGGCCAGGCAAAAAAGAAAAAGTAA
